# Supplementary material for: White light emission in water through admixtures of donor–π–acceptor siblings: experiment and simulation
Source: Royal Society of Chemistry journal article supplement (doi:10.1039/c9nj02389e), 2019-01-01
Supplement: c9nj02389e1.pdf [file c9nj02389e1.pdf]

# **White Light Emission in Water through Admixtures of Donor- $\pi$ -Acceptor Siblings: Experiment and Simulation**

Beena Kumari<sup>‡</sup>, Amit Singh<sup>‡</sup>, Palash Jana<sup>‡</sup>, Mithun Radhakrishna<sup>†</sup> and Sriram Kanvah<sup>‡\*</sup>.

<sup>\*‡</sup>Department of Chemistry, Indian Institute of Technology Gandhinagar Palaj Gandhinagar 382 355

<sup>†</sup>Department of Chemical Engineering, Indian Institute of Technology Gandhinagar Palaj Gandhinagar 382 355

\*[sriram@iitgn.ac.in](mailto:sriram@iitgn.ac.in), [kanvah@gatech.edu](mailto:kanvah@gatech.edu), [mithunr@iitgn.ac.in](mailto:mithunr@iitgn.ac.in)

| Fig S    | Title                                                                                                                                                                                                              | Page Number |
|----------|--------------------------------------------------------------------------------------------------------------------------------------------------------------------------------------------------------------------|-------------|
| 1        | Absorption spectra of stilbenes 1 and 3 in various solvents                                                                                                                                                        | 3           |
| 2        | Titration in binary solvents (1,4 dioxane-water)                                                                                                                                                                   | 3           |
| 3        | Binary mixture titrations of the molecules in acetonitrile                                                                                                                                                         | 4           |
| 4        | SEM images of mixtures of stilbenes ( <b>1-2</b> , <b>1-3</b> , <b>2-3</b> and <b>1-2-3</b> ) in water                                                                                                             | 4           |
| Table S1 | Schematic diagram shows the energy level comparison of the molecules estimated from DFT computation and the isodensity surface plots of the frontier molecular orbitals (FMOs)                                     | 5           |
| 5        | Figure showing superimposition of atomic coordinates of all three molecules obtained after 100 ns equilibrated run from single molecule MD simulation. ( <b>1</b> in black, <b>2</b> in red and <b>3</b> in green) | 5           |
| 6        | Geometry obtained from 100 ns equilibrated MD simulation with selected dihedral angles                                                                                                                             | 5           |
| 7        | Theoretically computed energy differences and their comparison with experimental data                                                                                                                              | 6           |
| Table S2 | Geometry obtained from 100 ns equilibrated MD simulation with selected dihedral angles                                                                                                                             | 6           |
| 8        | <sup>1</sup> H and <sup>13</sup> C NMR of Stilbene <b>1</b>                                                                                                                                                        | 7           |
| 9        | <sup>1</sup> H, <sup>13</sup> C NMR spectra of Stilbene <b>2</b>                                                                                                                                                   | 8           |
| 10       | <sup>1</sup> H, <sup>13</sup> C NMR spectra of Stilbene <b>3</b>                                                                                                                                                   | 9           |

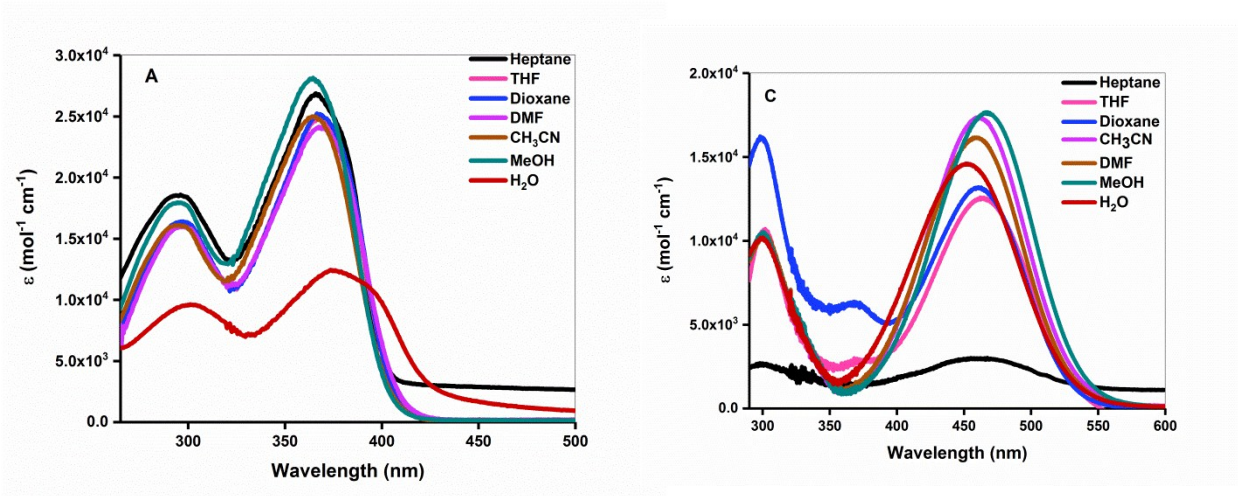

Fig S1. Absorption spectra of stilbenes 1 and 3 in various solvents

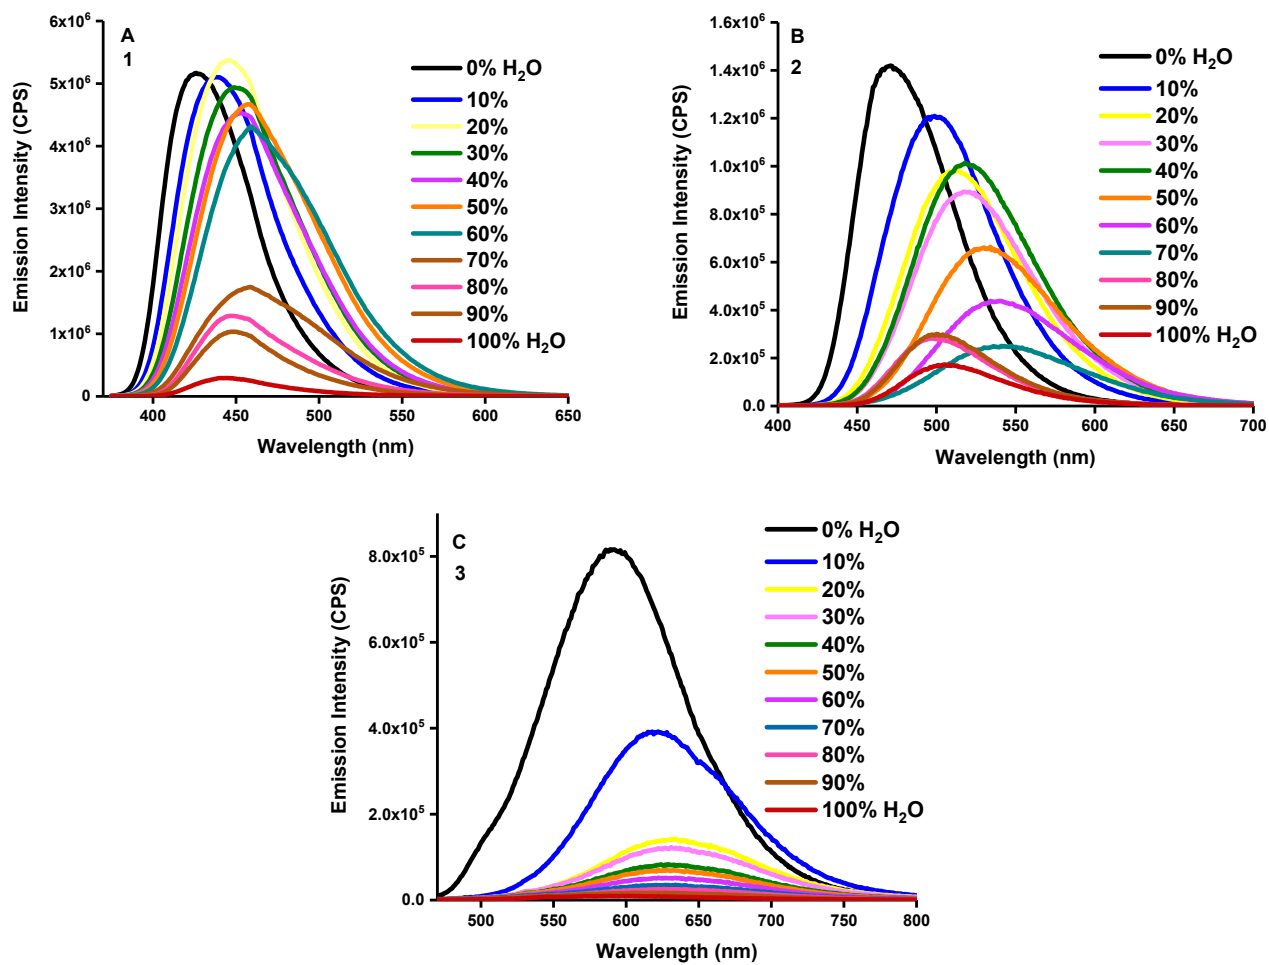

Fig S2. Emission spectra of Stilbenes 1-3 in dioxane-water binary mixture: Water fraction is gradually increased.

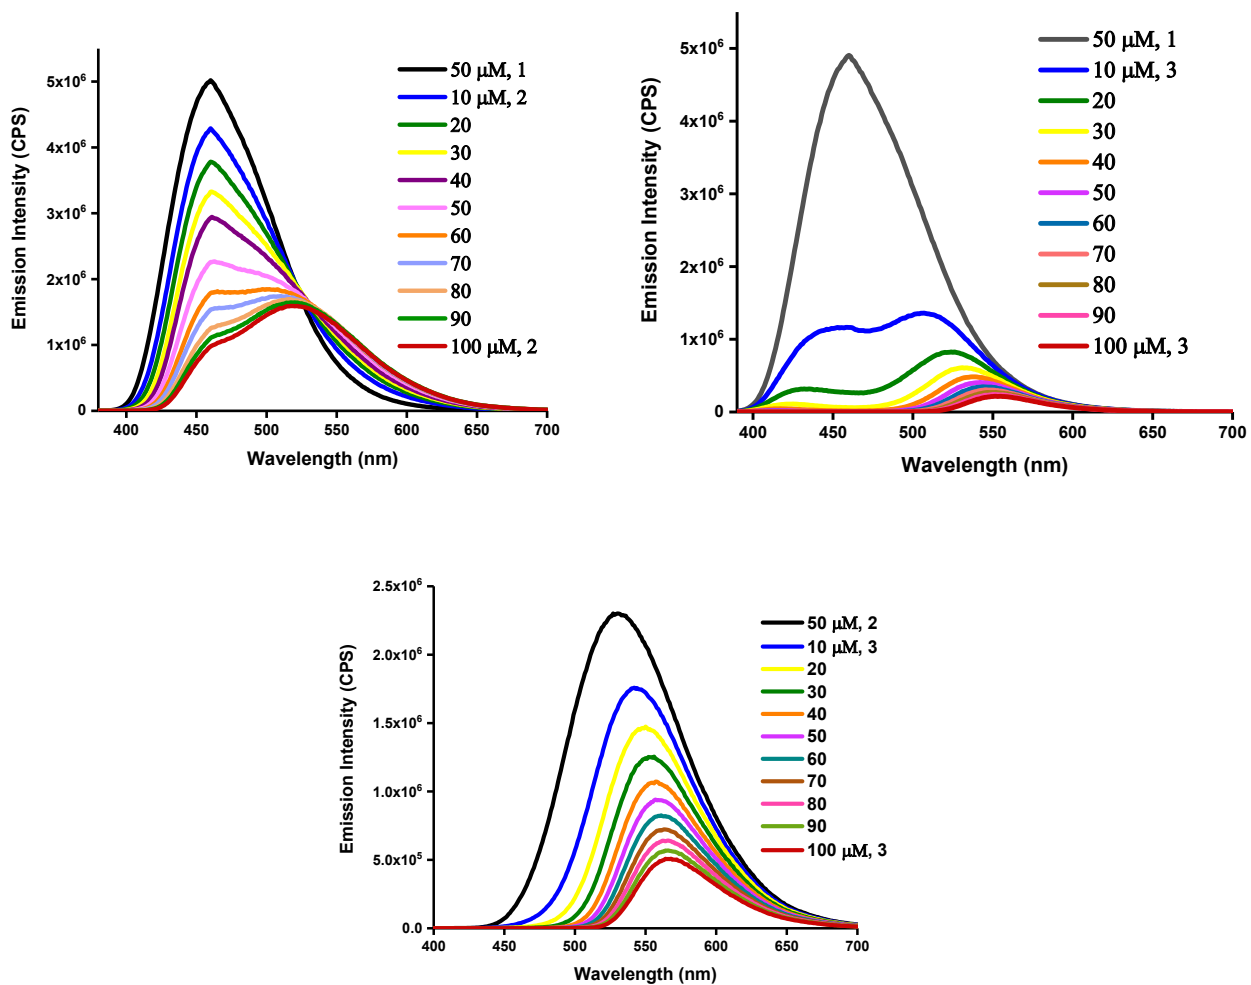

Fig S3. Emission spectra of binary mixtures of stilbenes (1-2, 1-3 and 2-3) in acetonitrile.

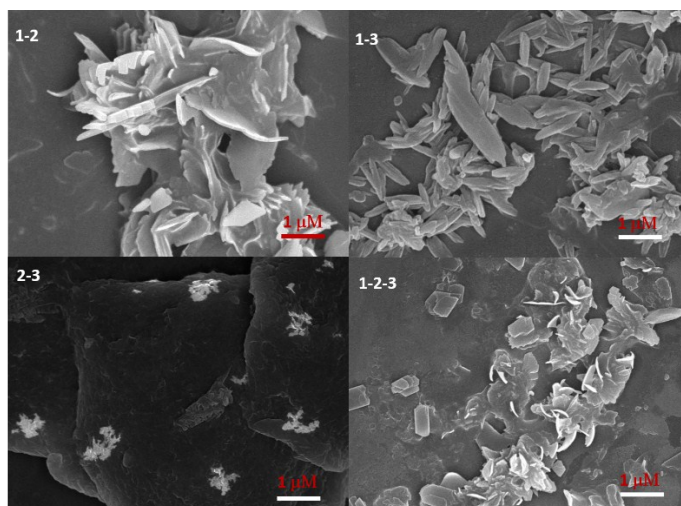

Fig S4. SEM images of mixtures of stilbenes (1-2, 1-3, 2-3 and 1-2-3) in water.

Table S1: Concentrations of samples used and their CIE coordinates obtained.

|   | Water: 1+3 ( $\mu\text{M}$ )        | CIE Coordinates | CH <sub>3</sub> CN: 1+2 ( $\mu\text{M}$ ) | CIE Coordinates |
|---|-------------------------------------|-----------------|-------------------------------------------|-----------------|
| 1 | 50 $\mu\text{M}$ & 10 $\mu\text{M}$ | 0.40,0.42       | 50 $\mu\text{M}$ & 10 $\mu\text{M}$       | 0.18,0.22       |
| 2 | 50 & 20                             | 0.38,0.37       | 50 $\mu\text{M}$ & 20 $\mu\text{M}$       | 0.19, 0.28      |
| 3 | 50 & 30                             | 0.37,0.35       | 50 $\mu\text{M}$ & 30 $\mu\text{M}$       | 0.20,0.36       |
| 4 | 50 & 40                             | 0.35,0.33       | 50 $\mu\text{M}$ & 40 $\mu\text{M}$       | 0.22,0.40       |
| 5 | 50 & 50                             | 0.34,0.33       | 50 $\mu\text{M}$ & 50 $\mu\text{M}$       | 0.49, 0.32      |
| 6 | 50 & 60                             | 0.31, 0.32      | 50 $\mu\text{M}$ & 60 $\mu\text{M}$       | 0.60, 0.41      |
| 7 | 50 & 70                             | 0.28,0.30       | -                                         | -               |

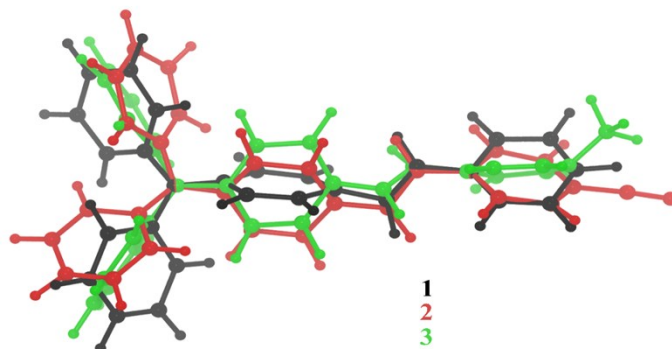

Fig S5. Figure showing superimposition of atomic coordinates of all three molecules obtained after 100 ns equilibrated run from single molecule MD simulation. (1 in black, 2 in red and 3 in green)

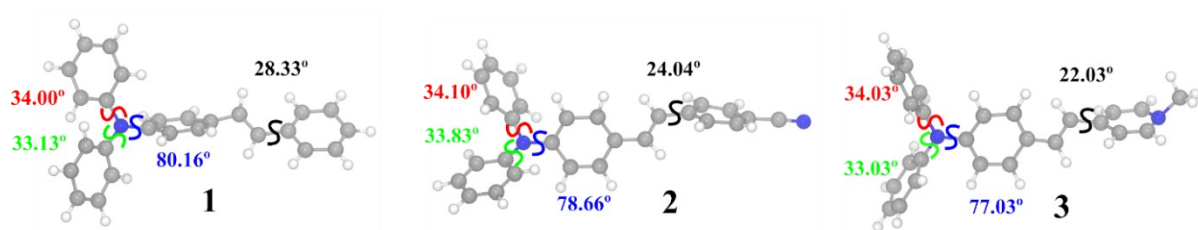

Fig S6. Geometry obtained from 100 ns equilibrated MD simulation with selected dihedral angles.

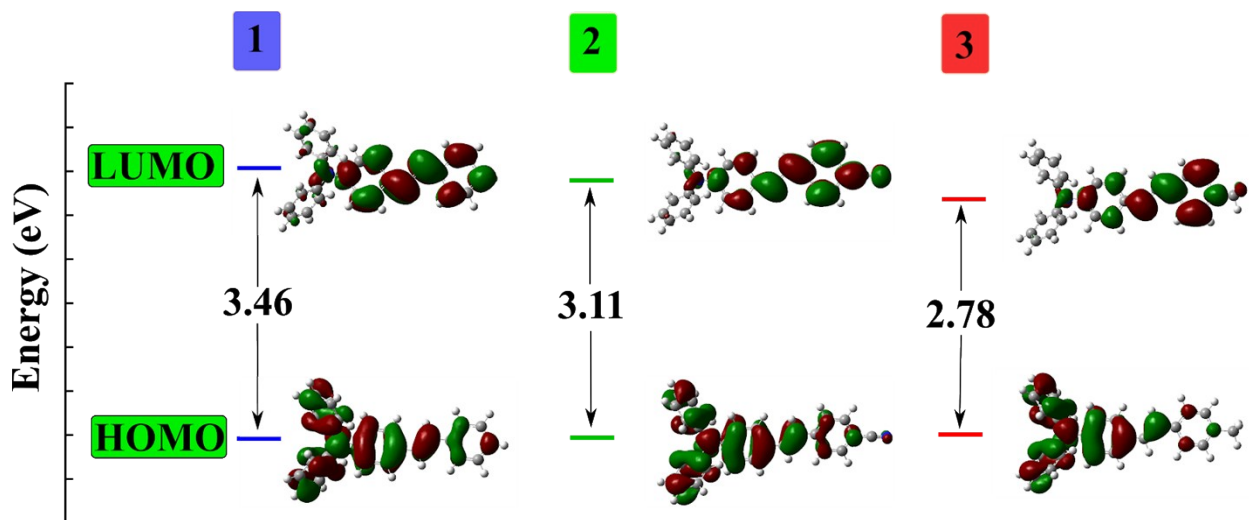

Fig S7. Schematic diagram shows the energy level comparison of the molecules estimated from DFT computation and the isodensity surface plots of the frontier molecular orbitals (FMOs).

Table-S2: Theoretically computed energy differences and their comparison with experimental data

| Molecule | Energies (Hartrees)             |                                  |                                  |                                 | XS <sub>0</sub> -GS <sub>0</sub> | XS <sub>1</sub> -GS <sub>1</sub> | Solvent Contribution (Abs) kcal/mol | Solvent Contribution (Em) kcal/mol | Absorption (nm) |      | Emission (nm) |      |
|----------|---------------------------------|----------------------------------|----------------------------------|---------------------------------|----------------------------------|----------------------------------|-------------------------------------|------------------------------------|-----------------|------|---------------|------|
|          | Ground State (GS <sub>0</sub> ) | Excited State (XS <sub>0</sub> ) | Excited State (XS <sub>1</sub> ) | Ground State (GS <sub>1</sub> ) |                                  |                                  |                                     |                                    | Theor           | Expt | Theor         | Expt |
| 1        | -1058.02664159                  | -1057.89946191                   | -1057.91250700                   | -1058.01162921                  | 3.46073714435619                 | 2.69725410519141                 | -8.12                               | -0.016776206                       | 358             | 377  | 460           | 451  |
| 2        | -1150.2736002                   | -1150.15894980                   | -1150.171343275                  | -1150.2585301                   | 3.11979789455581                 | 2.372475569802                   | -12.95                              | -16.24                             | 400             | 400  | 522.59        | 504  |
| 3        | -1574.20239                     | -1574.10013                      | -1574.10781505                   | -1574.191210                    | 2.78263776399694                 | 2.26929334242881                 | -45.29                              | -48.99                             | 445.67          | 450  | 548           | 670  |

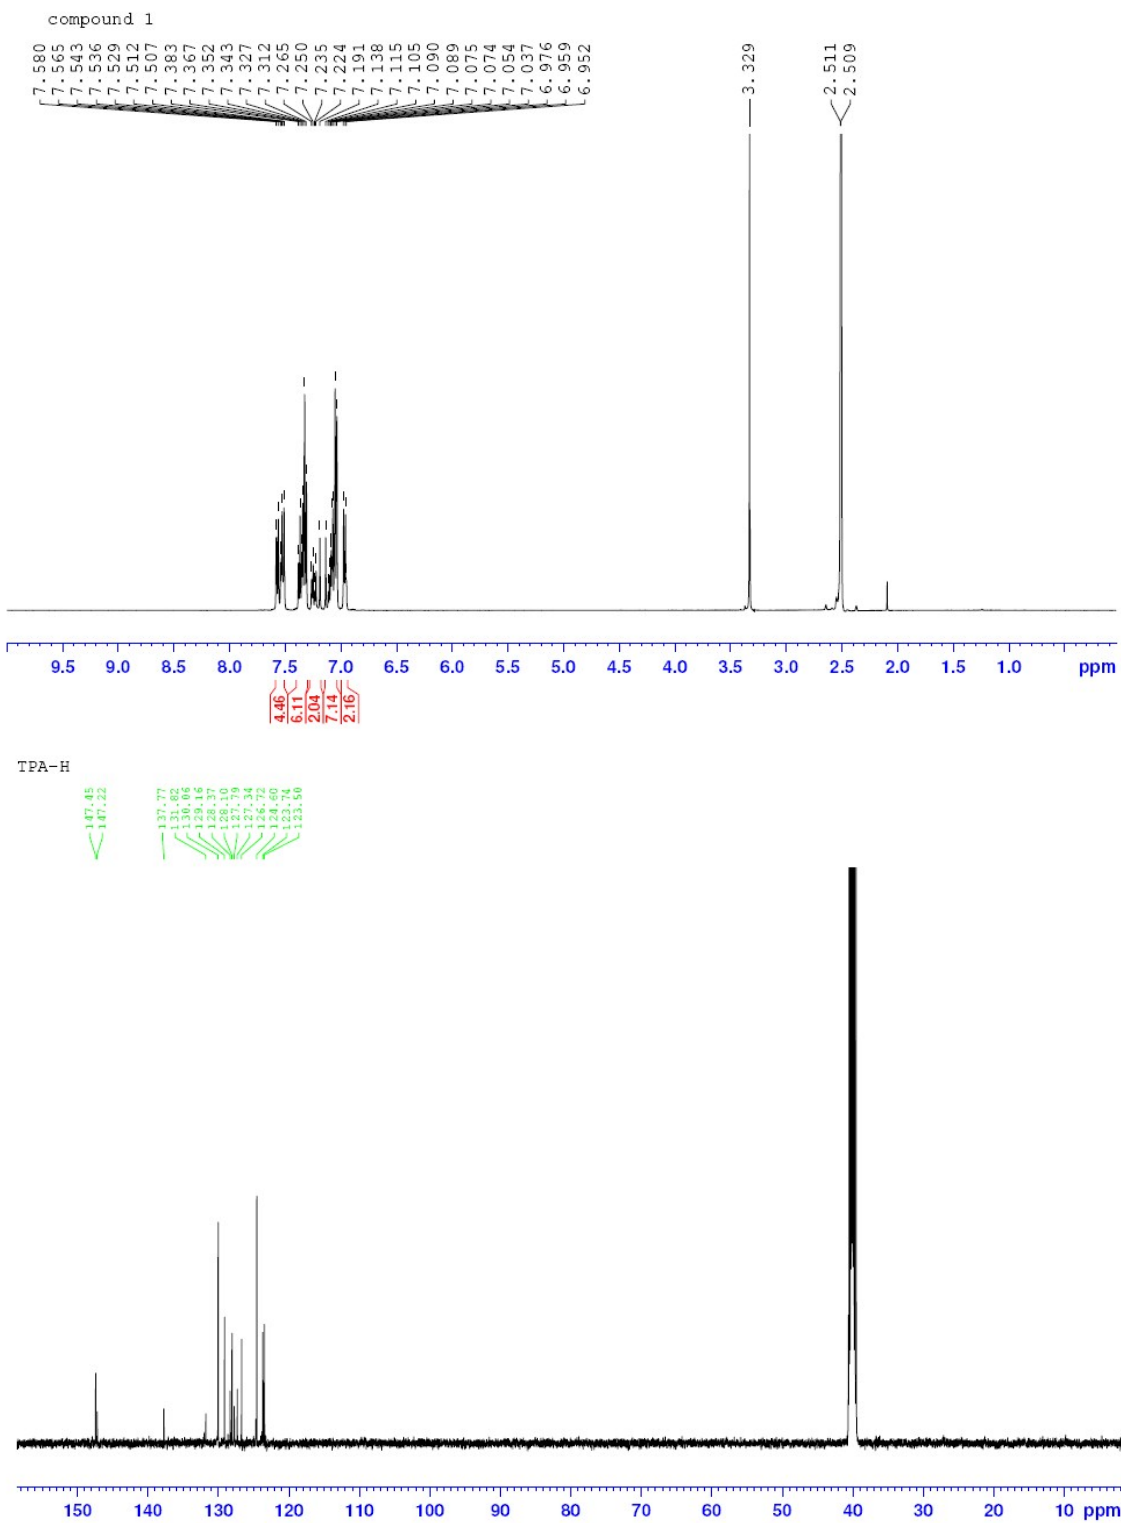

Fig S8.  $^1\text{H}$ ,  $^{13}\text{C}$  NMR and mass data of stilbene 1

TPA\_MONO\_CN

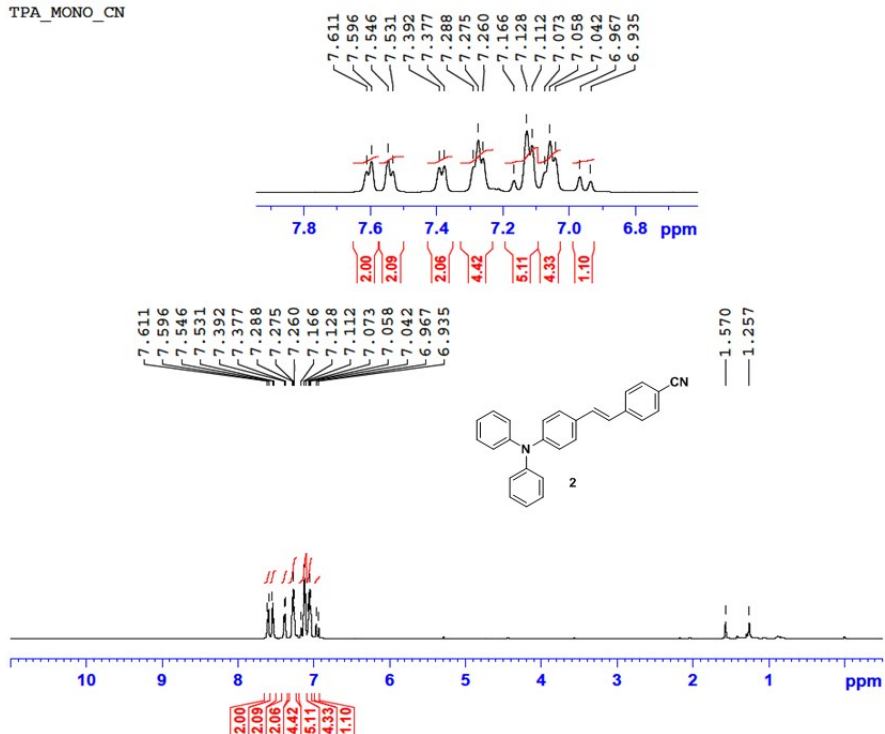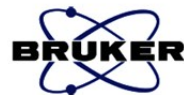

Current Data Parameters  
 NAME beena  
 EXPNO 22  
 PROCNO 1

F2 - Acquisition Parameters  
 Date\_ 20170123  
 Time\_ 21.06  
 INSTRUM spect  
 PROBHD 5 mm PABBO BB/  
 PULPROG zg30  
 TD 65536  
 SOLVENT CDCl3  
 NS 32  
 DS 2  
 SWH 10000.000 Hz  
 FIDRES 0.152588 Hz  
 AQ 3.2767939 sec  
 RC 137.26  
 DW 50.000 usec  
 DE 6.50 usec  
 TE 297.8 K  
 D1 1.00000000 sec  
 TDO 1

==== CHANNEL f1 =====  
 SFO1 500.0530880 MHz  
 NUC1 1H  
 P1 12.15 usec  
 PLW1 17.00000000 W

F2 - Processing parameters  
 SI 65536  
 SF 500.0500208 MHz  
 WDW EM  
 SSB 0  
 LB 0.30 Hz  
 GB 0  
 PC 1.00

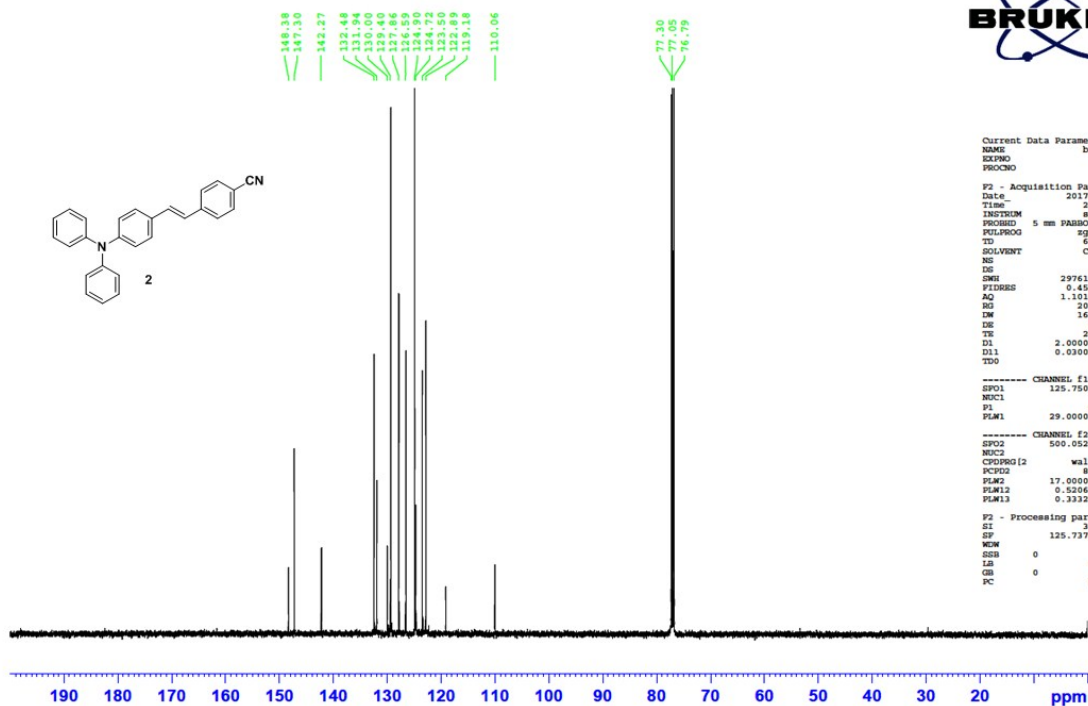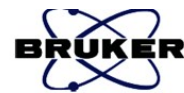

Current Data Parameters  
 NAME beena  
 EXPNO 29  
 PROCNO 1

F2 - Acquisition Parameters  
 Date\_ 20170201  
 Time\_ 21.16  
 INSTRUM spect  
 PROBHD 5 mm PABBO BB/  
 PULPROG zgpg30  
 TD 65536  
 SOLVENT CDCl3  
 NS 716  
 DS 4  
 SWH 29761.904 Hz  
 FIDRES 0.454131 Hz  
 AQ 1.1010048 sec  
 RC 200.08  
 DW 16.800 usec  
 DE 6.50 usec  
 TE 299.7 K  
 D1 3.00000000 sec  
 D11 0.03000000 sec  
 TDO 1

==== CHANNEL f1 =====  
 SFO1 125.7502457 MHz  
 NUC1 13C  
 P1 8.90 usec  
 PLW1 29.00000000 W

==== CHANNEL f2 =====  
 SFO2 500.0520002 MHz  
 NUC2 1H  
 CPDPRG2 waltz16  
 PCPD2 80.00 usec  
 PLW2 17.00000000 W  
 PLW12 0.52061999 W  
 PLW13 0.33320001 W

F2 - Processing parameters  
 SI 32768  
 SF 125.7376730 MHz  
 WDW EM  
 SSB 0  
 LB 1.00 Hz  
 GB 0  
 PC 1.40

Fig S9. <sup>1</sup>H, <sup>13</sup>C NMR spectra of Stilbene 2



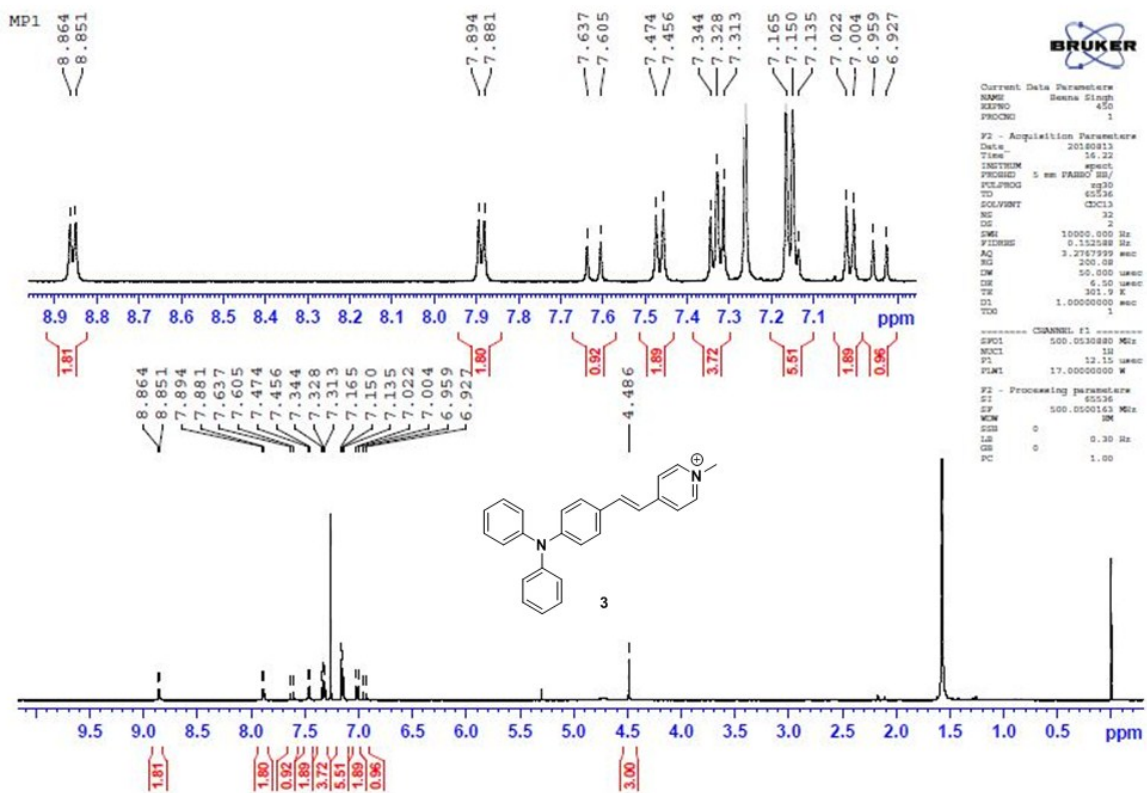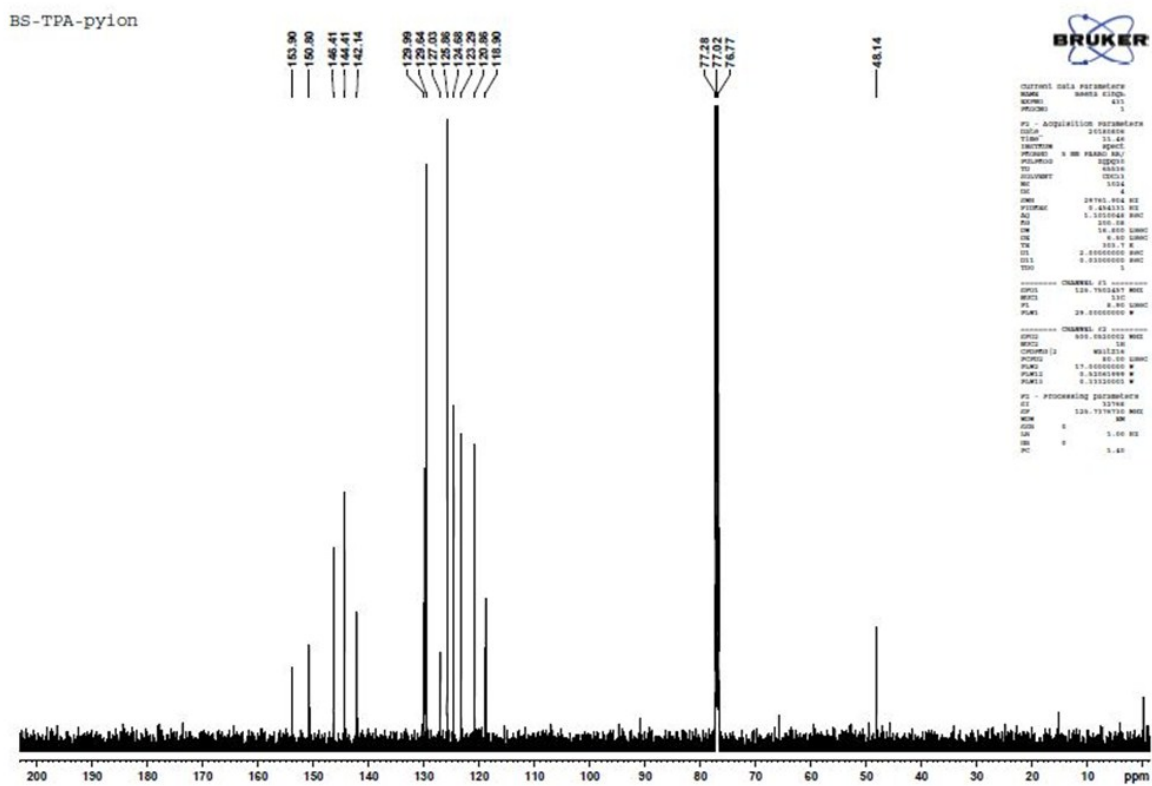

Fig S10. <sup>1</sup>H, <sup>13</sup>C NMR and LC-MS spectra of stilbene 3
